# Supplementary material
Source: publisher figshare collection journal article supplement (https://karger.figshare.com/ndownloader/files/23136578)
Supplement: Supplementary file 1 [file 23136578]

**Supplementary Table 1.** Minor allele frequencies of 36 single nucleotide polymorphisms in AMD-associated risk genes in progressors and non-progressors and their association with progression to late AMD

|  |  |  | **Progressors** | | **Non-progressors** | |  |  |  |
| --- | --- | --- | --- | --- | --- | --- | --- | --- | --- |
| **Gene** | **rs number** | **Minor allele** | **No. of minor alleles/total no. of alleles** | **MAF** | **No. of minor alleles/total no. of alleles** | **MAF** | **Odds Ratio** | **95% CI** | **P-value** |
| *ADAMTS9AS2* | rs6795735 | T | 36/90 | 0.400 | 138/338 | 0.408 | 0.98 | 0.599-1.589 | 0.92 |
| *APOE/TOMM40* | rs2075650 | G | 14/90 | 0.156 | 45/338 | 0.133 | 1.26 | 0.627-2.521 | 0.52 |
| *APOE/APOC1* | rs4420638 | G | 15/90 | 0.167 | 38/338 | 0.112 | 1.73 | 0.847-3.528 | 0.13 |
| *ARMS2* | rs10490924 | T | 31/90 | 0.344 | 103/338 | 0.305 | 1.24 | 0.753-2.034 | 0.40 |
| *B3GALTL* | rs9542236 | C | 38/90 | 0.422 | 158/338 | 0.467 | 0.91 | 0.557-1.474 | 0.69 |
| *C3* | rs433594 | T | 44/90 | 0.489 | 134/334 | 0.401 | 1.60 | 0.949-2.712 | 0.08 |
| *C3* | rs2230199 | G | 24/88 | 0.273 | 79/332 | 0.238 | 1.22 | 0.712-2.103 | 0.47 |
| *C3* | rs1047286 | A | 23/90 | 0.256 | 77/330 | 0.233 | 1.12 | 0.642-1.953 | 0.69 |
| *CCDC109B* | rs4698775 | G | 29/90 | 0.322 | 111/334 | 0.332 | 1.01 | 0.613-1.674 | 0.96 |
| *CETP* | rs3764261 | A | 41/90 | 0.456 | 105/336 | 0.313 | 1.92 | 1.178-3.135 | 0.01 |
| *CFB* | rs4151667 | A | 1/90 | 0.011 | 16/338 | 0.047 | 0.25 | 0.032-1.992 | 0.19 |
| *CFB* | rs641153 | A | 4/90 | 0.044 | 26/338 | 0.077 | 0.51 | 0.165-1.547 | 0.23 |
| *CFH* | rs800292 | A | 11/96 | 0.115 | 85/340 | 0.250 | 0.37 | 0.185-0.735 | 0.01 |
| *CFH* | rs1061170 | C | 58/90 | 0.644 | 138/336 | 0.411 | 2.57 | 1.574-4.187 | < 0.001 |
| *CFH* | rs12144939 | T | 10/90 | 0.111 | 61/338 | 0.180 | 0.58 | 0.290-1.162 | 0.12 |
| *CFI* | rs10033900 | T | 42/88 | 0.477 | 161/334 | 0.482 | 0.97 | 0.601-1.578 | 0.92 |
| *COL8A1* | rs13081855 | T | 7/90 | 0.078 | 36/338 | 0.107 | 0.78 | 0.324-1.886 | 0.58 |
| *COL10A1* | rs3812111 | A | 31/90 | 0.344 | 132/336 | 0.393 | 0.80 | 0.488-1.325 | 0.39 |
| *CYP24A1* | rs1570669 | G | 34/90 | 0.378 | 104/336 | 0.310 | 1.35 | 0.844-2.162 | 0.21 |
| *FADS1* | rs174547 | C | 35/90 | 0.389 | 111/338 | 0.328 | 1.32 | 0.792-2.213 | 0.29 |
| *GLI2* | rs6721654 | T | 7/90 | 0.078 | 31/338 | 0.092 | 0.85 | 0.343-2.090 | 0.72 |
| *GLI3* | rs2049622 | A | 43/90 | 0.478 | 175/334 | 0.524 | 0.83 | 0.528-1.298 | 0.41 |
| *IER3DDR* | rs3130783 | G | 17/90 | 0.189 | 65/338 | 0.192 | 0.96 | 0.521-1.761 | 0.89 |
| *IGFR1* | rs2872060 | T | 41/90 | 0.456 | 141/336 | 0.420 | 1.22 | 0.742-2.018 | 0.43 |
| *LIPC* | rs10468017 | T | 25/90 | 0.278 | 92/336 | 0.274 | 1.02 | 0.618-1.669 | 0.95 |
| *LPL* | rs12678919 | G | 13/90 | 0.144 | 35/332 | 0.105 | 1.52 | 0.732-3.170 | 0.26 |
| *MYRIP* | rs2679798 | G | 46/90 | 0.511 | 155/338 | 0.459 | 1.24 | 0.784-1.973 | 0.36 |
| *PON1* | rs705381 | T | 24/90 | 0.267 | 84/336 | 0.250 | 1.14 | 0.673-1.932 | 0.63 |
| *RAD51B* | rs8017304 | G | 33/90 | 0.367 | 126/338 | 0.373 | 0.96 | 0.592-1.544 | 0.86 |
| *SKIV2L* | rs429608 | A | 7/90 | 0.078 | 45/336 | 0.134 | 0.55 | 0.238-1.267 | 0.16 |
| *SLC16A8* | rs8135665 | T | 19/90 | 0.211 | 77/336 | 0.229 | 0.96 | 0.529-1.723 | 0.88 |
| *TGFBR1* | rs334353 | G | 18/90 | 0.200 | 81/338 | 0.240 | 0.75 | 0.413-1.372 | 0.35 |
| *TIMP3* | rs9621532 | C | 5/90 | 0.056 | 16/336 | 0.048 | 1.13 | 0.387-3.323 | 0.82 |
| *TNFRSF10A* | rs13278062 | T | 47/86 | 0.547 | 184/336 | 0.548 | 0.97 | 0.595-1.587 | 0.91 |
| *TYR* | rs621313 | G | 49/88 | 0.557 | 167/336 | 0.497 | 1.31 | 0.813-2.099 | 0.27 |
| *VEGFA* | rs943080 | C | 40/90 | 0.444 | 165/338 | 0.488 | 0.83 | 0.498-1.376 | 0.47 |

CI: Confidence Interval, MAF: Minor Allele Frequency
